# Supplementary material for: Facile synthesis of MnO2–Ag hollow microspheres with sheet-like subunits and their catalytic properties
Source: Royal Society of Chemistry journal article supplement (doi:10.1039/c3ce41992d), 2013-11-05
Supplement: c3ce41992d.pdf [file c3ce41992d.pdf]

## Supporting Information

### **Facile synthesis of MnO<sub>2</sub>-Ag hollow microspheres with sheet-like subunits and their catalytic properties**

Dan-Ling Zhou,<sup>a</sup> De-Jun Chen,<sup>b</sup> Pei-Pei Zhang,<sup>b</sup> Fang-Fang Li,<sup>b</sup> Jian-Rong Chen,<sup>a</sup> Ai-Jun Wang<sup>a\*</sup>  
and Jiu-Ju Feng<sup>a\*</sup>

<sup>a</sup> *College of Geography and Environmental Science, College of Chemistry and Life Science, Zhejiang Normal University, Jinhua 321004, China*

<sup>b</sup> *College of Chemistry and Chemical Engineering, Henan Normal University, Xinxiang 453007, China*

*\*Corresponding author: Tel./Fax: 86-579-82282273; E-mail: [ajwang@zjnu.cn](mailto:ajwang@zjnu.cn) (AJW) and E-mail: [jjfeng@zjnu.cn](mailto:jjfeng@zjnu.cn) (JJF)*

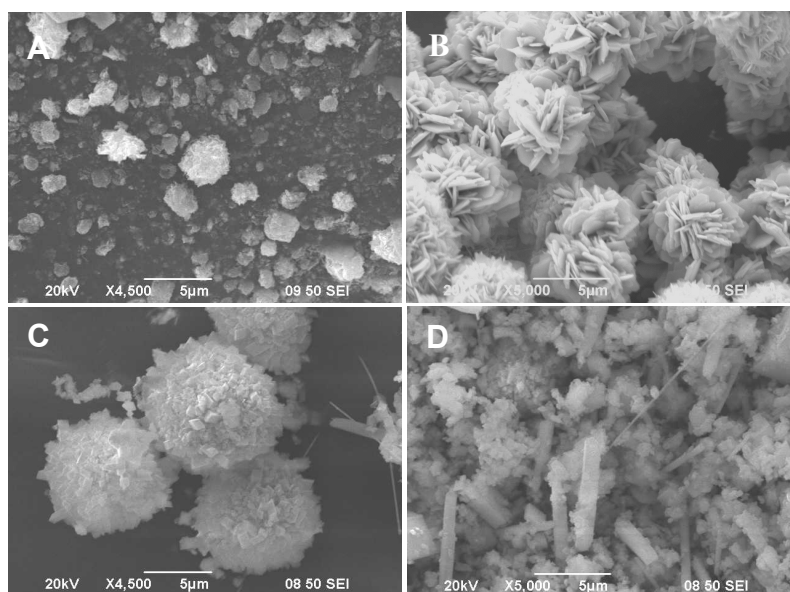

**Fig. S1.** SEM images of the products prepared at different reaction temperature: room temperature without hydrothermal treatment (A), 100 °C (B), 160 °C (C), and 200 °C (D).

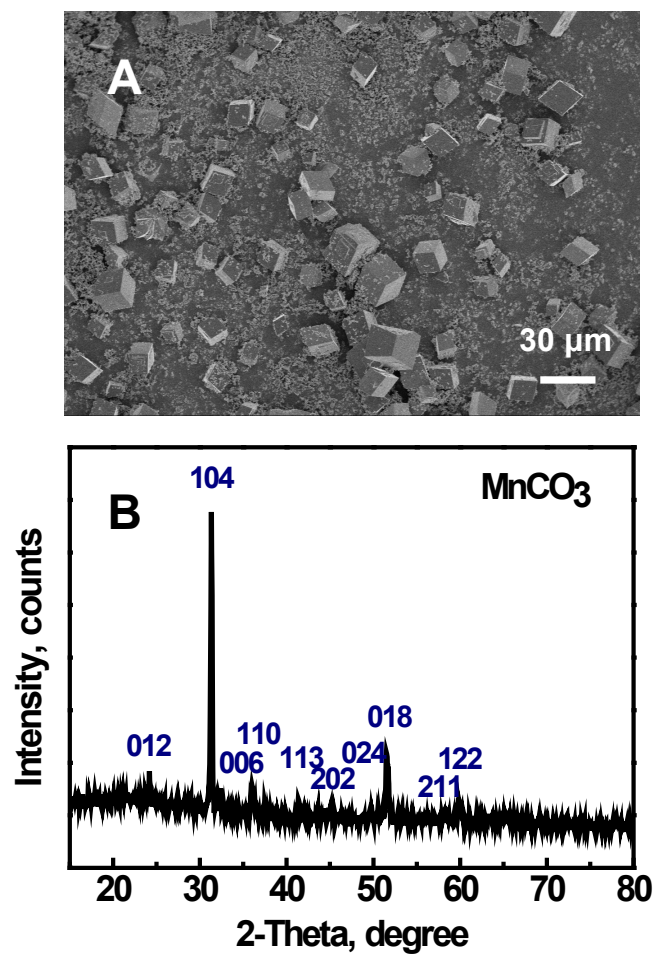

**Fig. S2.** (A) SEM image and XRD pattern (B) of the products prepared without AgNO<sub>3</sub>.

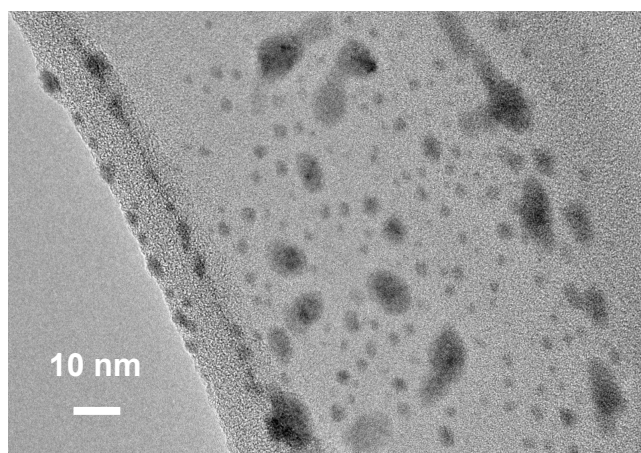

**Fig. S3.** TEM image of the product obtained at 130 °C for 0.5 h.

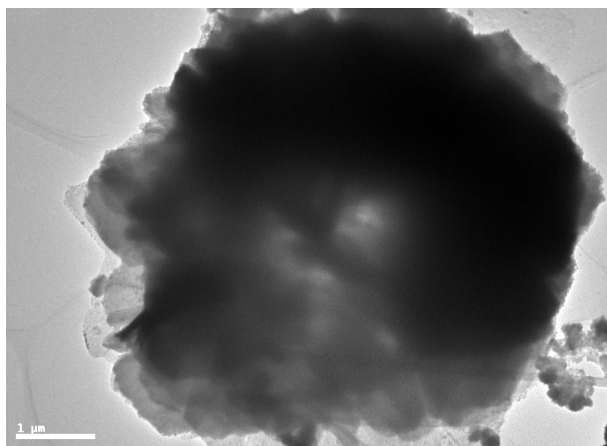

**Fig. S4.** High-magnification TEM image of the product obtained at 130 °C for 2 h.

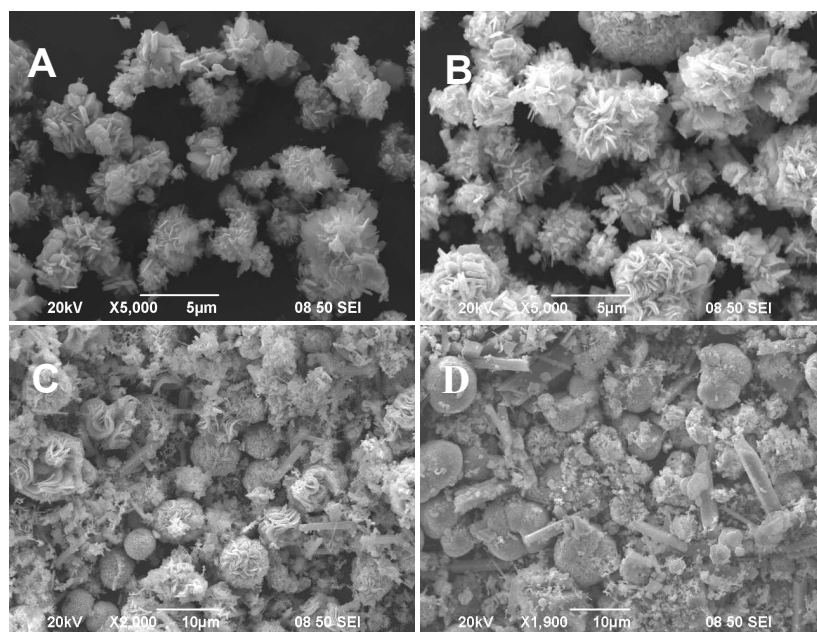

**Fig. S5.** SEM images of the products prepared at different reaction time: 1 h (A), 2 h (B), 5 h (C), and 10 h (D).

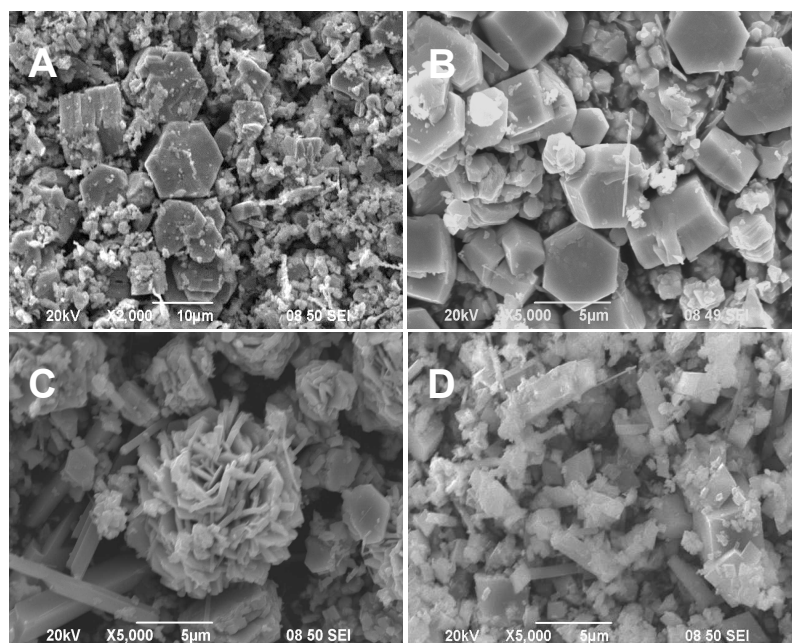

**Fig. S6.** SEM images of the products prepared with different amount of urea: 0.024 g (A), 0.144 g (B), 0.48 g (C), and 4.80 g (D).

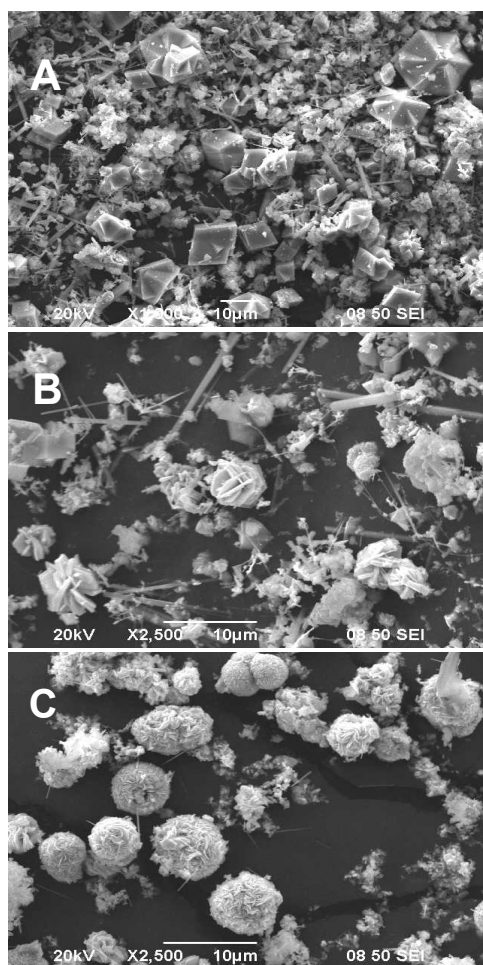

**Fig. S7.** SEM images of the products obtained with different molar ratios of Mn<sup>2+</sup>/Ag<sup>+</sup>:  
2:1 (A), 1:1 (B), and 1:3 (C) at 130 °C.



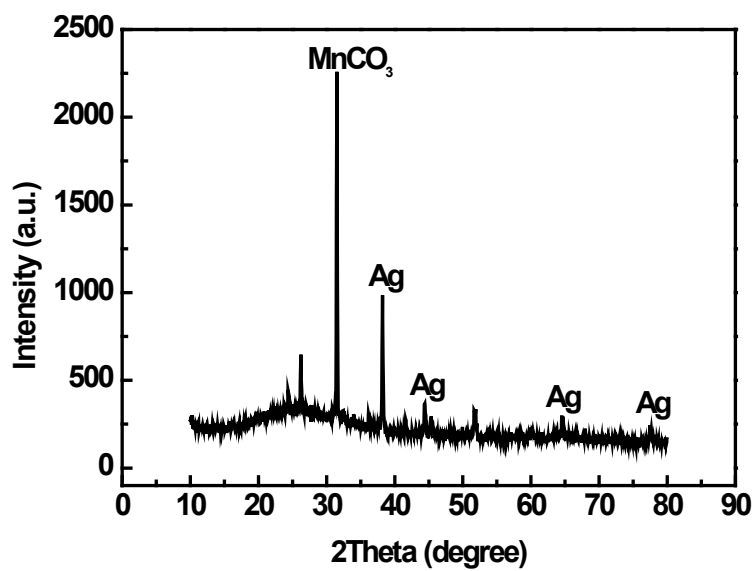

**Fig. S8.** X-ray diffraction pattern of the product using the molar ratio ( $\text{Mn}^{2+}/\text{Ag}^{+}$ ) of 2:1.

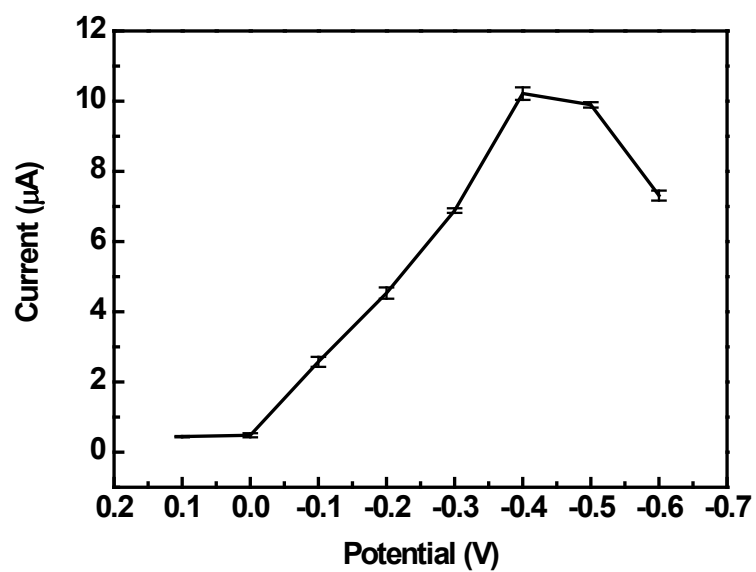

**Fig. S9.** Effects of the applied potentials on the steady-state responses of the MnO<sub>2</sub>-Ag HMs modified CPE in a 25 mM phosphate solution (pH 7.0) containing 1.25 mM H<sub>2</sub>O<sub>2</sub>.

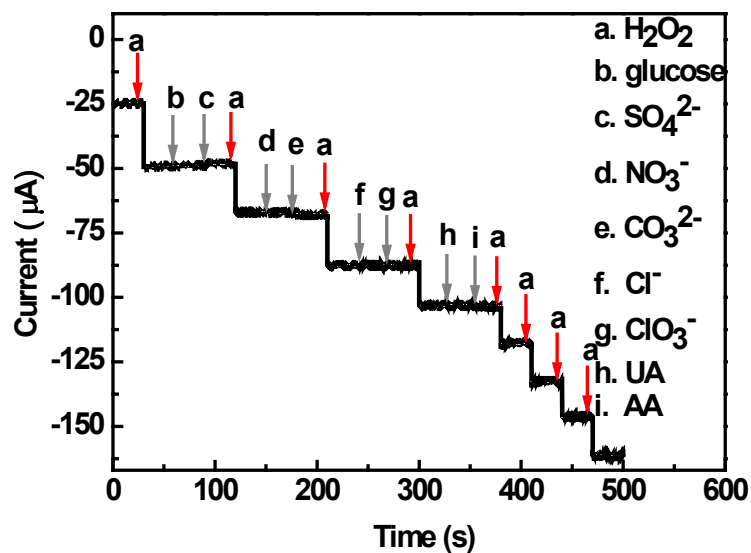

**Fig. S10.** Amperometric *i-t* curve of the MnO<sub>2</sub>-Ag HMs modified CPE with successive addition of 1.0 mM H<sub>2</sub>O<sub>2</sub>, ClO<sub>3</sub><sup>-</sup>, UA, and AA, as well as 10 mM glucose, SO<sub>4</sub><sup>2-</sup>, NO<sub>3</sub><sup>-</sup>, CO<sub>3</sub><sup>2-</sup>, and Cl<sup>-</sup> ions in a 25 mM phosphate solution (pH 7.0) at -0.4 V.

**Table S1.** Comparison of the MnO<sub>2</sub>-Ag HMs sensor with other MnO<sub>2</sub> based H<sub>2</sub>O<sub>2</sub> sensors.

| Materials                           | Stability       | Linear ranges           | Detection limit/ $\mu$ M | Refs.    |
|-------------------------------------|-----------------|-------------------------|--------------------------|----------|
| MnO <sub>2</sub> -Ag HMs/CPE        | 90% (4 weeks)   | 1.31 $\mu$ M ~ 36.71 mM | 1.31                     | Our work |
| $\beta$ -MnO <sub>2</sub> nanorods  | 90% (30 days)   | 2.45 $\mu$ M ~ 42.85 mM | 2.45                     | 1        |
| Ag-MnO <sub>2</sub> -MWCNTs         | 90% (3 days)    | 5.0 $\mu$ M ~ 10.4 mM   | 1.7                      | 2        |
| MnO <sub>2</sub> microspheres       | 89.0% (4 weeks) | 10.0 $\mu$ M ~ 0.15 mM  | 2.0                      | 3        |
| MnO <sub>2</sub> /graphene oxide    | 90% (4 weeks)   | 5 $\mu$ M ~ 0.6 mM      | 0.8                      | 4        |
| MnO <sub>2</sub> /carbon fiber      | not detected    | 12 $\mu$ M ~ 0.26 mM    | 5.4                      | 5        |
| MnO <sub>2</sub> -mesoporous carbon | 92% (1 month)   | 0.5 $\mu$ M ~ 0.6 mM    | 0.07                     | 6        |
| MnO <sub>2</sub> -VACNTs            | 92% (30 days)   | 1.2 $\mu$ M ~ 1.8 mM    | 0.8                      | 7        |

## References

- 1 A.-J. Wang, P.-P. Zhang, Y.-F. Li, J.-J. Feng, W.-J. Dong and X.-Y. Liu, *Microchim. Acta* 2011, **175**, 31-37.
- 2 Y. Han, J. Zheng and S. Dong, *Electrochim. Acta* 2013, **90**, 35-43.
- 3 L. Zhang, Z. Fang, Y. Ni and G. Zhao, *Int. J. Electrochem. Sci.* 2009, **4**, 407-413.
- 4 L. Li, Z. Du, S. Liu, Q. Hao, Y. Wang, Q. Li and T. Wang, *Talanta* 2010, **82**, 1637-1641.
- 5 S. B. Hocevar, B. Ogorevc, K. Schachl and K. Kalcher, *Electroanalysis* 2004, **16**, 1711-1716.

6 L. Luo, F. Li, L. Zhu, Z. Zhang, Y. Ding and D. Deng, *Electrochim. Acta* 2012, **77**,

179-183.

7 B. Xu, M.-L. Ye, Y.-X. Yu and W.-D. Zhang, *Anal. Chim. Acta* 2010, **674**, 20-26.
